Development 133, 5001 (2006) doi:10.1242/dev.02730

## Retinoids signal directly to zebrafish endoderm to specify *insulin*-expressing $\beta$ -cells

David Stafford, Richard J. White, Mary D. Kinkel, Angela Linville, Thomas F. Schilling and Victoria E. Prince

There was an error published in *Development* **133**, 949-956.

There was a mistake in the sequence of the *raldh2* morpholino, which was missing three nucleotides. The correct sequence is as follows:

5' GCAGTTCAACTTCACTGGAGGTCAT

The authors apologise to readers for this mistake.
